# Supplementary material for: In Vivo and In Vitro Matured Oocytes From Mice of Advanced Reproductive Age Exhibit Alternative Splicing Processes for Mitochondrial Oxidative Phosphorylation
Source: Front Endocrinol (Lausanne). 2022 Jan 26;13:816606. doi: 10.3389/fendo.2022.816606 (PMC8826577; doi:10.3389/fendo.2022.816606)
Supplement: Supplementary file 4 [file Table_2.xls]

## Sheet: Sheet1
Num	Pathway id	Description	Database	Ratio_in_study	Ratio_in_pop	Pvalue	Padjust	First Category	Second Category
59	map00190	Oxidative phosphorylation	KEGG PATHWAY	59/1691	448/28724	6.25613e-09	2.02698e-06	Metabolism	Energy metabolism
49	map04932	Non-alcoholic fatty liver disease (NAFLD)	KEGG PATHWAY	49/1691	378/28724	1.92012e-07	3.1106e-05	Human Diseases	Endocrine and metabolic disease
76	map05016	Huntington disease	KEGG PATHWAY	76/1691	744/28724	2.16984e-06	0.000234342	Human Diseases	Neurodegenerative disease
54	map05012	Parkinson disease	KEGG PATHWAY	54/1691	491/28724	8.00135e-06	0.00064811	Human Diseases	Neurodegenerative disease
26	map04260	Cardiac muscle contraction	KEGG PATHWAY	26/1691	197/28724	9.92567e-05	0.00535986	Organismal Systems	Circulatory system
12	map00514	Other types of O-glycan biosynthesis	KEGG PATHWAY	12/1691	57/28724	9.91736e-05	0.00642645	Metabolism	Glycan biosynthesis and metabolism
12	map00630	Glyoxylate and dicarboxylate metabolism	KEGG PATHWAY	12/1691	61/28724	0.000196415	0.00909119	Metabolism	Carbohydrate metabolism
10	map00020	Citrate cycle (TCA cycle)	KEGG PATHWAY	10/1691	49/28724	0.000484554	0.0196244	Metabolism	Carbohydrate metabolism
19	map05231	Choline metabolism in cancer	KEGG PATHWAY	19/1691	143/28724	0.000747543	0.0269115	Human Diseases	Cancer: overview
33	map04723	Retrograde endocannabinoid signaling	KEGG PATHWAY	33/1691	313/28724	0.000902187	0.0292309	Organismal Systems	Nervous system
66	map04714	Thermogenesis	KEGG PATHWAY	66/1691	764/28724	0.00122191	0.0359907	Organismal Systems	Environmental adaptation
12	map00510	N-Glycan biosynthesis	KEGG PATHWAY	12/1691	75/28724	0.00137777	0.0371998	Metabolism	Glycan biosynthesis and metabolism
16	map00620	Pyruvate metabolism	KEGG PATHWAY	16/1691	118/28724	0.00152313	0.0379611	Metabolism	Carbohydrate metabolism
17	map04070	Phosphatidylinositol signaling system	KEGG PATHWAY	17/1691	130/28724	0.00165002	0.0381861	Environmental Information Processing	Signal transduction
17	map00564	Glycerophospholipid metabolism	KEGG PATHWAY	17/1691	132/28724	0.00194903	0.0420991	Metabolism	Lipid metabolism
19	map05412	Arrhythmogenic right ventricular cardiomyopathy (ARVC)	KEGG PATHWAY	19/1691	156/28724	0.00211486	0.0428258	Human Diseases	Cardiovascular disease
12	map00640	Propanoate metabolism	KEGG PATHWAY	12/1691	82/28724	0.0029946	0.0570736	Metabolism	Carbohydrate metabolism
10	map00513	Various types of N-glycan biosynthesis	KEGG PATHWAY	10/1691	63/28724	0.00357182	0.0642927	Metabolism	Glycan biosynthesis and metabolism
7	map04392	Hippo signaling pathway - multiple species	KEGG PATHWAY	7/1691	36/28724	0.00447702	0.0763449	Environmental Information Processing	Signal transduction
10	map00280	Valine, leucine and isoleucine degradation	KEGG PATHWAY	10/1691	70/28724	0.00765389	0.123993	Metabolism	Amino acid metabolism
7	map00410	beta-Alanine metabolism	KEGG PATHWAY	7/1691	40/28724	0.00815059	0.125752	Metabolism	Metabolism of other amino acids
9	map04973	Carbohydrate digestion and absorption	KEGG PATHWAY	9/1691	61/28724	0.0090408	0.133146	Organismal Systems	Digestive system
5	map00531	Glycosaminoglycan degradation	KEGG PATHWAY	5/1691	23/28724	0.00970819	0.136759	Metabolism	Glycan biosynthesis and metabolism
23	map00230	Purine metabolism	KEGG PATHWAY	23/1691	233/28724	0.0108089	0.14592	Metabolism	Nucleotide metabolism
7	map04130	SNARE interactions in vesicular transport	KEGG PATHWAY	7/1691	46/28724	0.0172531	0.2236	Genetic Information Processing	Folding, sorting and degradation
6	map00601	Glycosphingolipid biosynthesis - lacto and neolacto series	KEGG PATHWAY	6/1691	37/28724	0.0199573	0.230935	Metabolism	Glycan biosynthesis and metabolism
20	map04142	Lysosome	KEGG PATHWAY	20/1691	205/28724	0.0186467	0.232367	Cellular Processes	Transport and catabolism
9	map02010	ABC transporters	KEGG PATHWAY	9/1691	69/28724	0.0194823	0.233788	Environmental Information Processing	Membrane transport
15	map05211	Renal cell carcinoma	KEGG PATHWAY	15/1691	144/28724	0.022763	0.254317	Human Diseases	Cancer: specific types
12	map00240	Pyrimidine metabolism	KEGG PATHWAY	12/1691	108/28724	0.0251175	0.271269	Metabolism	Nucleotide metabolism
17	map04152	AMPK signaling pathway	KEGG PATHWAY	17/1691	179/28724	0.0354937	0.348483	Environmental Information Processing	Signal transduction
8	map00565	Ether lipid metabolism	KEGG PATHWAY	8/1691	64/28724	0.0335651	0.350809	Metabolism	Lipid metabolism
11	map04978	Mineral absorption	KEGG PATHWAY	11/1691	101/28724	0.0353619	0.35804	Organismal Systems	Digestive system
16	map04540	Gap junction	KEGG PATHWAY	16/1691	170/28724	0.0433452	0.379564	Cellular Processes	Cellular community - eukaryotes
6	map00650	Butanoate metabolism	KEGG PATHWAY	6/1691	44/28724	0.0429088	0.386179	Metabolism	Carbohydrate metabolism
11	map00562	Inositol phosphate metabolism	KEGG PATHWAY	11/1691	104/28724	0.0424135	0.392628	Metabolism	Carbohydrate metabolism
5	map00563	Glycosylphosphatidylinositol (GPI)-anchor biosynthesis	KEGG PATHWAY	5/1691	33/28724	0.0422473	0.402592	Metabolism	Glycan biosynthesis and metabolism
11	map04512	ECM-receptor interaction	KEGG PATHWAY	11/1691	106/28724	0.0476193	0.406017	Environmental Information Processing	Signaling molecules and interaction
11	map04976	Bile secretion	KEGG PATHWAY	11/1691	107/28724	0.0503781	0.418526	Organismal Systems	Digestive system
11	map03050	Proteasome	KEGG PATHWAY	11/1691	110/28724	0.059294	0.436619	Genetic Information Processing	Folding, sorting and degradation
7	map00052	Galactose metabolism	KEGG PATHWAY	7/1691	60/28724	0.0617059	0.444282	Metabolism	Carbohydrate metabolism
10	map00561	Glycerolipid metabolism	KEGG PATHWAY	10/1691	97/28724	0.0592724	0.446611	Metabolism	Lipid metabolism
84	map05010	Alzheimer disease	KEGG PATHWAY	84/1691	1211/28724	0.0664548	0.44857	Human Diseases	Neurodegenerative disease
3	map00533	Glycosaminoglycan biosynthesis - keratan sulfate	KEGG PATHWAY	3/1691	16/28724	0.0642062	0.452235	Metabolism	Glycan biosynthesis and metabolism
1	map00300	Lysine biosynthesis	KEGG PATHWAY	1/1691	1/28724	0.0588706	0.454145	Metabolism	Amino acid metabolism
31	map04810	Regulation of actin cytoskeleton	KEGG PATHWAY	31/1691	391/28724	0.0574801	0.454233	Cellular Processes	Cell motility
7	map03020	RNA polymerase	KEGG PATHWAY	7/1691	61/28724	0.0663314	0.457263	Genetic Information Processing	Transcription
14	map00980	Metabolism of xenobiotics by cytochrome P450	KEGG PATHWAY	14/1691	149/28724	0.0566974	0.459249	Metabolism	Xenobiotics biodegradation and metabolism
7	map00380	Tryptophan metabolism	KEGG PATHWAY	7/1691	62/28724	0.0711601	0.470528	Metabolism	Amino acid metabolism
16	map05410	Hypertrophic cardiomyopathy (HCM)	KEGG PATHWAY	16/1691	184/28724	0.0769586	0.488913	Human Diseases	Cardiovascular disease
7	map05216	Thyroid cancer	KEGG PATHWAY	7/1691	63/28724	0.0761921	0.493725	Human Diseases	Cancer: specific types
27	map04510	Focal adhesion	KEGG PATHWAY	27/1691	345/28724	0.0813271	0.506731	Cellular Processes	Cellular community - eukaryotes
5	map00512	Mucin type O-glycan biosynthesis	KEGG PATHWAY	5/1691	40/28724	0.0840114	0.513579	Metabolism	Glycan biosynthesis and metabolism
3	map00740	Riboflavin metabolism	KEGG PATHWAY	3/1691	18/28724	0.0858367	0.51502	Metabolism	Metabolism of cofactors and vitamins
6	map00600	Sphingolipid metabolism	KEGG PATHWAY	6/1691	54/28724	0.0965474	0.568752	Metabolism	Lipid metabolism
4	map00515	Mannose type O-glycan biosynthesis	KEGG PATHWAY	4/1691	31/28724	0.106706	0.59608	Metabolism	Glycan biosynthesis and metabolism
12	map00480	Glutathione metabolism	KEGG PATHWAY	12/1691	136/28724	0.105272	0.598385	Metabolism	Metabolism of other amino acids
13	map01524	Platinum drug resistance	KEGG PATHWAY	13/1691	150/28724	0.105058	0.607833	Human Diseases	Drug resistance: antineoplastic
11	map00330	Arginine and proline metabolism	KEGG PATHWAY	11/1691	125/28724	0.118859	0.652715	Metabolism	Amino acid metabolism
8	map05213	Endometrial cancer	KEGG PATHWAY	8/1691	84/28724	0.120954	0.653154	Human Diseases	Cancer: specific types
3	map00511	Other glycan degradation	KEGG PATHWAY	3/1691	21/28724	0.123097	0.653828	Metabolism	Glycan biosynthesis and metabolism
11	map05133	Pertussis	KEGG PATHWAY	11/1691	127/28724	0.128697	0.66187	Human Diseases	Infectious disease: bacterial
8	map04920	Adipocytokine signaling pathway	KEGG PATHWAY	8/1691	85/28724	0.127064	0.664011	Organismal Systems	Endocrine system
5	map00500	Starch and sucrose metabolism	KEGG PATHWAY	5/1691	46/28724	0.132161	0.669064	Metabolism	Carbohydrate metabolism
20	map04062	Chemokine signaling pathway	KEGG PATHWAY	20/1691	260/28724	0.134738	0.671617	Organismal Systems	Immune system
17	map04270	Vascular smooth muscle contraction	KEGG PATHWAY	17/1691	216/28724	0.137202	0.673538	Organismal Systems	Circulatory system
7	map05217	Basal cell carcinoma	KEGG PATHWAY	7/1691	75/28724	0.151903	0.683562	Human Diseases	Cancer: specific types
10	map04974	Protein digestion and absorption	KEGG PATHWAY	10/1691	117/28724	0.151516	0.691423	Organismal Systems	Digestive system
9	map04061	Viral protein interaction with cytokine and cytokine receptor	KEGG PATHWAY	9/1691	106/28724	0.172132	0.697133	Environmental Information Processing	Signaling molecules and interaction
7	map04979	Cholesterol metabolism	KEGG PATHWAY	7/1691	76/28724	0.159403	0.697926	Organismal Systems	Digestive system
10	map04146	Peroxisome	KEGG PATHWAY	10/1691	118/28724	0.157404	0.698617	Cellular Processes	Transport and catabolism
7	map03460	Fanconi anemia pathway	KEGG PATHWAY	7/1691	74/28724	0.144571	0.699122	Genetic Information Processing	Replication and repair
4	map04710	Circadian rhythm	KEGG PATHWAY	4/1691	37/28724	0.171263	0.702394	Organismal Systems	Environmental adaptation
2	map00400	Phenylalanine, tyrosine and tryptophan biosynthesis	KEGG PATHWAY	2/1691	13/28724	0.176056	0.704225	Metabolism	Amino acid metabolism
13	map04971	Gastric acid secretion	KEGG PATHWAY	13/1691	164/28724	0.169967	0.706015	Organismal Systems	Digestive system
3	map00061	Fatty acid biosynthesis	KEGG PATHWAY	3/1691	23/28724	0.15063	0.707308	Metabolism	Lipid metabolism
3	map00532	Glycosaminoglycan biosynthesis - chondroitin sulfate / dermatan sulfate	KEGG PATHWAY	3/1691	23/28724	0.15063	0.707308	Metabolism	Glycan biosynthesis and metabolism
6	map00250	Alanine, aspartate and glutamate metabolism	KEGG PATHWAY	6/1691	61/28724	0.148471	0.707423	Metabolism	Amino acid metabolism
15	map00983	Drug metabolism - other enzymes	KEGG PATHWAY	15/1691	193/28724	0.166388	0.709336	Metabolism	Xenobiotics biodegradation and metabolism
12	map04933	AGE-RAGE signaling pathway in diabetic complications	KEGG PATHWAY	12/1691	149/28724	0.168578	0.709339	Human Diseases	Endocrine and metabolic disease
9	map04911	Insulin secretion	KEGG PATHWAY	9/1691	105/28724	0.165548	0.715166	Organismal Systems	Endocrine system
1	map00785	Lipoic acid metabolism	KEGG PATHWAY	1/1691	4/28724	0.215502	0.727321	Metabolism	Metabolism of cofactors and vitamins
6	map04962	Vasopressin-regulated water reabsorption	KEGG PATHWAY	6/1691	67/28724	0.200973	0.731632	Organismal Systems	Excretory system
3	map00534	Glycosaminoglycan biosynthesis - heparan sulfate / heparin	KEGG PATHWAY	3/1691	27/28724	0.210518	0.733416	Metabolism	Glycan biosynthesis and metabolism
7	map04930	Type II diabetes mellitus	KEGG PATHWAY	7/1691	81/28724	0.199261	0.733643	Human Diseases	Endocrine and metabolic disease
63	map05168	Herpes simplex virus 1 infection	KEGG PATHWAY	63/1691	954/28724	0.186476	0.736807	Human Diseases	Infectious disease: viral
4	map04744	Phototransduction	KEGG PATHWAY	4/1691	40/28724	0.207606	0.739169	Organismal Systems	Sensory system
4	map00360	Phenylalanine metabolism	KEGG PATHWAY	4/1691	40/28724	0.207606	0.739169	Metabolism	Amino acid metabolism
11	map01522	Endocrine resistance	KEGG PATHWAY	11/1691	143/28724	0.221936	0.741312	Human Diseases	Drug resistance: antineoplastic
12	map04972	Pancreatic secretion	KEGG PATHWAY	12/1691	157/28724	0.215101	0.741413	Organismal Systems	Digestive system
12	map05230	Central carbon metabolism in cancer	KEGG PATHWAY	12/1691	157/28724	0.215101	0.741413	Human Diseases	Cancer: overview
5	map04975	Fat digestion and absorption	KEGG PATHWAY	5/1691	52/28724	0.189969	0.741567	Organismal Systems	Digestive system
9	map04721	Synaptic vesicle cycle	KEGG PATHWAY	9/1691	109/28724	0.192585	0.742826	Organismal Systems	Nervous system
15	map05100	Bacterial invasion of epithelial cells	KEGG PATHWAY	15/1691	201/28724	0.206515	0.743454	Human Diseases	Infectious disease: bacterial
2	map00072	Synthesis and degradation of ketone bodies	KEGG PATHWAY	2/1691	14/28724	0.197813	0.745248	Metabolism	Lipid metabolism
2	map03450	Non-homologous end-joining	KEGG PATHWAY	2/1691	14/28724	0.197813	0.745248	Genetic Information Processing	Replication and repair
8	map00260	Glycine, serine and threonine metabolism	KEGG PATHWAY	8/1691	95/28724	0.196282	0.748183	Metabolism	Amino acid metabolism
23	map04141	Protein processing in endoplasmic reticulum	KEGG PATHWAY	23/1691	332/28724	0.238629	0.788937	Genetic Information Processing	Folding, sorting and degradation
2	map00603	Glycosphingolipid biosynthesis - globo and isoglobo series	KEGG PATHWAY	2/1691	16/28724	0.242102	0.792333	Metabolism	Glycan biosynthesis and metabolism
10	map04912	GnRH signaling pathway	KEGG PATHWAY	10/1691	132/28724	0.250446	0.795535	Organismal Systems	Endocrine system
4	map04966	Collecting duct acid secretion	KEGG PATHWAY	4/1691	43/28724	0.245896	0.796705	Organismal Systems	Excretory system
6	map05219	Bladder cancer	KEGG PATHWAY	6/1691	72/28724	0.249113	0.799134	Human Diseases	Cancer: specific types
10	map05218	Melanoma	KEGG PATHWAY	10/1691	134/28724	0.265098	0.818018	Human Diseases	Cancer: specific types
7	map04929	GnRH secretion	KEGG PATHWAY	7/1691	88/28724	0.260606	0.819769	Organismal Systems	Endocrine system
7	map04927	Cortisol synthesis and secretion	KEGG PATHWAY	7/1691	90/28724	0.279055	0.821943	Organismal Systems	Endocrine system
7	map03440	Homologous recombination	KEGG PATHWAY	7/1691	93/28724	0.307296	0.822843	Genetic Information Processing	Replication and repair
2	map00130	Ubiquinone and other terpenoid-quinone biosynthesis	KEGG PATHWAY	2/1691	17/28724	0.264425	0.823787	Metabolism	Metabolism of cofactors and vitamins
1	map00471	D-Glutamine and D-glutamate metabolism	KEGG PATHWAY	1/1691	6/28724	0.305165	0.823945	Metabolism	Metabolism of other amino acids
16	map04934	Cushing syndrome	KEGG PATHWAY	16/1691	235/28724	0.310341	0.824184	Human Diseases	Endocrine and metabolic disease
8	map05221	Acute myeloid leukemia	KEGG PATHWAY	8/1691	105/28724	0.277506	0.824881	Human Diseases	Cancer: specific types
9	map04137	Mitophagy - animal	KEGG PATHWAY	9/1691	120/28724	0.275241	0.825723	Cellular Processes	Transport and catabolism
8	map04970	Salivary secretion	KEGG PATHWAY	8/1691	108/28724	0.303507	0.826355	Organismal Systems	Digestive system
5	map03060	Protein export	KEGG PATHWAY	5/1691	62/28724	0.30092	0.833316	Genetic Information Processing	Folding, sorting and degradation
5	map03030	DNA replication	KEGG PATHWAY	5/1691	62/28724	0.30092	0.833316	Genetic Information Processing	Replication and repair
4	map00900	Terpenoid backbone biosynthesis	KEGG PATHWAY	4/1691	46/28724	0.28556	0.833526	Metabolism	Metabolism of terpenoids and polyketides
9	map00982	Drug metabolism - cytochrome P450	KEGG PATHWAY	9/1691	123/28724	0.299413	0.836292	Metabolism	Xenobiotics biodegradation and metabolism
2	map00770	Pantothenate and CoA biosynthesis	KEGG PATHWAY	2/1691	20/28724	0.331095	0.838085	Metabolism	Metabolism of cofactors and vitamins
13	map05204	Chemical carcinogenesis	KEGG PATHWAY	13/1691	190/28724	0.3286	0.838318	Human Diseases	Cancer: overview
10	map04928	Parathyroid hormone synthesis, secretion and action	KEGG PATHWAY	10/1691	141/28724	0.318279	0.838394	Organismal Systems	Endocrine system
10	map05214	Glioma	KEGG PATHWAY	10/1691	143/28724	0.3339	0.838634	Human Diseases	Cancer: specific types
10	map04925	Aldosterone synthesis and secretion	KEGG PATHWAY	10/1691	138/28724	0.295167	0.838897	Organismal Systems	Endocrine system
3	map04977	Vitamin digestion and absorption	KEGG PATHWAY	3/1691	34/28724	0.323678	0.838973	Organismal Systems	Digestive system
3	map00592	alpha-Linolenic acid metabolism	KEGG PATHWAY	3/1691	31/28724	0.274507	0.839058	Metabolism	Lipid metabolism
3	map00730	Thiamine metabolism	KEGG PATHWAY	3/1691	31/28724	0.274507	0.839058	Metabolism	Metabolism of cofactors and vitamins
13	map05226	Gastric cancer	KEGG PATHWAY	13/1691	189/28724	0.321867	0.841008	Human Diseases	Cancer: specific types
3	map00670	One carbon pool by folate	KEGG PATHWAY	3/1691	35/28724	0.34011	0.841188	Metabolism	Metabolism of cofactors and vitamins
17	map04611	Platelet activation	KEGG PATHWAY	17/1691	248/28724	0.293398	0.841247	Organismal Systems	Immune system
11	map04916	Melanogenesis	KEGG PATHWAY	11/1691	153/28724	0.290859	0.841414	Organismal Systems	Endocrine system
11	map05110	Vibrio cholerae infection	KEGG PATHWAY	11/1691	158/28724	0.327384	0.841845	Human Diseases	Infectious disease: bacterial
4	map01523	Antifolate resistance	KEGG PATHWAY	4/1691	47/28724	0.29899	0.842372	Human Diseases	Drug resistance: antineoplastic
4	map05020	Prion diseases	KEGG PATHWAY	4/1691	50/28724	0.339636	0.846478	Human Diseases	Neurodegenerative disease
22	map05225	Hepatocellular carcinoma	KEGG PATHWAY	22/1691	340/28724	0.354523	0.870192	Human Diseases	Cancer: specific types
4	map01040	Biosynthesis of unsaturated fatty acids	KEGG PATHWAY	4/1691	52/28724	0.366849	0.880437	Metabolism	Lipid metabolism
9	map05017	Spinocerebellar ataxia	KEGG PATHWAY	9/1691	131/28724	0.36594	0.884811	Human Diseases	Neurodegenerative disease
7	map05120	Epithelial cell signaling in Helicobacter pylori infection	KEGG PATHWAY	7/1691	100/28724	0.374905	0.886637	Human Diseases	Infectious disease: bacterial
15	map05224	Breast cancer	KEGG PATHWAY	15/1691	229/28724	0.372813	0.888172	Human Diseases	Cancer: specific types
7	map04730	Long-term depression	KEGG PATHWAY	7/1691	99/28724	0.365159	0.889561	Organismal Systems	Nervous system
6	map04370	VEGF signaling pathway	KEGG PATHWAY	6/1691	85/28724	0.384695	0.890294	Environmental Information Processing	Signal transduction
4	map00053	Ascorbate and aldarate metabolism	KEGG PATHWAY	4/1691	53/28724	0.380438	0.893203	Metabolism	Carbohydrate metabolism
1	map04122	Sulfur relay system	KEGG PATHWAY	1/1691	8/28724	0.384585	0.896443	Genetic Information Processing	Folding, sorting and degradation
31	map04015	Rap1 signaling pathway	KEGG PATHWAY	31/1691	509/28724	0.448952	0.914846	Environmental Information Processing	Signal transduction
3	map00340	Histidine metabolism	KEGG PATHWAY	3/1691	40/28724	0.421305	0.916126	Metabolism	Amino acid metabolism
8	map05223	Non-small cell lung cancer	KEGG PATHWAY	8/1691	124/28724	0.447291	0.917229	Human Diseases	Cancer: specific types
19	map04024	cAMP signaling pathway	KEGG PATHWAY	19/1691	306/28724	0.439093	0.917846	Environmental Information Processing	Signal transduction
27	map05164	Influenza A	KEGG PATHWAY	27/1691	441/28724	0.444951	0.918243	Human Diseases	Infectious disease: viral
2	map00100	Steroid biosynthesis	KEGG PATHWAY	2/1691	24/28724	0.416949	0.918991	Metabolism	Lipid metabolism
15	map04670	Leukocyte transendothelial migration	KEGG PATHWAY	15/1691	235/28724	0.411365	0.919187	Organismal Systems	Immune system
5	map00790	Folate biosynthesis	KEGG PATHWAY	5/1691	74/28724	0.442579	0.919202	Metabolism	Metabolism of cofactors and vitamins
16	map04919	Thyroid hormone signaling pathway	KEGG PATHWAY	16/1691	253/28724	0.420638	0.920857	Organismal Systems	Endocrine system
16	map04360	Axon guidance	KEGG PATHWAY	16/1691	254/28724	0.426881	0.922062	Organismal Systems	Development and regeneration
14	map04922	Glucagon signaling pathway	KEGG PATHWAY	14/1691	217/28724	0.40131	0.922159	Organismal Systems	Endocrine system
4	map04960	Aldosterone-regulated sodium reabsorption	KEGG PATHWAY	4/1691	55/28724	0.407506	0.9233	Organismal Systems	Excretory system
3	map00220	Arginine biosynthesis	KEGG PATHWAY	3/1691	39/28724	0.405277	0.924717	Metabolism	Amino acid metabolism
9	map00590	Arachidonic acid metabolism	KEGG PATHWAY	9/1691	137/28724	0.416804	0.924962	Metabolism	Lipid metabolism
8	map04330	Notch signaling pathway	KEGG PATHWAY	8/1691	120/28724	0.411144	0.925075	Environmental Information Processing	Signal transduction
4	map05030	Cocaine addiction	KEGG PATHWAY	4/1691	57/28724	0.434328	0.925805	Human Diseases	Substance dependence
10	map05210	Colorectal cancer	KEGG PATHWAY	10/1691	156/28724	0.437547	0.92657	Human Diseases	Cancer: specific types
10	map04713	Circadian entrainment	KEGG PATHWAY	10/1691	156/28724	0.437547	0.92657	Organismal Systems	Environmental adaptation
9	map04931	Insulin resistance	KEGG PATHWAY	9/1691	139/28724	0.433768	0.930735	Human Diseases	Endocrine and metabolic disease
5	map00520	Amino sugar and nucleotide sugar metabolism	KEGG PATHWAY	5/1691	76/28724	0.465819	0.931638	Metabolism	Carbohydrate metabolism
11	map04071	Sphingolipid signaling pathway	KEGG PATHWAY	11/1691	176/28724	0.463522	0.932803	Environmental Information Processing	Signal transduction
19	map04921	Oxytocin signaling pathway	KEGG PATHWAY	19/1691	310/28724	0.461921	0.935391	Organismal Systems	Endocrine system
5	map03420	Nucleotide excision repair	KEGG PATHWAY	5/1691	77/28724	0.477329	0.948801	Genetic Information Processing	Replication and repair
4	map00350	Tyrosine metabolism	KEGG PATHWAY	4/1691	61/28724	0.486829	0.961783	Metabolism	Amino acid metabolism
11	map04722	Neurotrophin signaling pathway	KEGG PATHWAY	11/1691	180/28724	0.493625	0.969299	Organismal Systems	Nervous system
14	map04261	Adrenergic signaling in cardiomyocytes	KEGG PATHWAY	14/1691	232/28724	0.501335	0.97265	Organismal Systems	Circulatory system
3	map04136	Autophagy - other	KEGG PATHWAY	3/1691	45/28724	0.49885	0.973659	Cellular Processes	Transport and catabolism
13	map04726	Serotonergic synapse	KEGG PATHWAY	13/1691	219/28724	0.528424	0.983962	Organismal Systems	Nervous system
9	map04668	TNF signaling pathway	KEGG PATHWAY	9/1691	150/28724	0.525493	0.984161	Environmental Information Processing	Signal transduction
35	map05165	Human papillomavirus infection	KEGG PATHWAY	35/1691	594/28724	0.523055	0.98529	Human Diseases	Infectious disease: viral
6	map00051	Fructose and mannose metabolism	KEGG PATHWAY	6/1691	98/28724	0.52069	0.986571	Metabolism	Carbohydrate metabolism
2	map04964	Proximal tubule bicarbonate reclamation	KEGG PATHWAY	2/1691	29/28724	0.515753	0.988781	Organismal Systems	Excretory system
2	map00910	Nitrogen metabolism	KEGG PATHWAY	2/1691	29/28724	0.515753	0.988781	Metabolism	Energy metabolism
3	map00062	Fatty acid elongation	KEGG PATHWAY	3/1691	46/28724	0.513731	0.990766	Metabolism	Lipid metabolism
15	map04740	Olfactory transduction	KEGG PATHWAY	15/1691	1510/28724	1	1	Organismal Systems	Sensory system
6	map05014	Amyotrophic lateral sclerosis (ALS)	KEGG PATHWAY	6/1691	101/28724	0.550524	1	Human Diseases	Neurodegenerative disease
18	map05160	Hepatitis C	KEGG PATHWAY	18/1691	309/28724	0.553078	1	Human Diseases	Infectious disease: viral
12	map05145	Toxoplasmosis	KEGG PATHWAY	12/1691	206/28724	0.557223	1	Human Diseases	Infectious disease: parasitic
4	map00860	Porphyrin and chlorophyll metabolism	KEGG PATHWAY	4/1691	67/28724	0.561478	1	Metabolism	Metabolism of cofactors and vitamins
11	map05215	Prostate cancer	KEGG PATHWAY	11/1691	191/28724	0.573824	1	Human Diseases	Cancer: specific types
7	map04720	Long-term potentiation	KEGG PATHWAY	7/1691	121/28724	0.573845	1	Organismal Systems	Nervous system
54	map05200	Pathways in cancer	KEGG PATHWAY	54/1691	934/28724	0.575808	1	Human Diseases	Cancer: overview
23	map05167	Kaposi sarcoma-associated herpesvirus infection	KEGG PATHWAY	23/1691	402/28724	0.586975	1	Human Diseases	Infectious disease: viral
6	map04924	Renin secretion	KEGG PATHWAY	6/1691	105/28724	0.588926	1	Organismal Systems	Endocrine system
10	map05220	Chronic myeloid leukemia	KEGG PATHWAY	10/1691	176/28724	0.591849	1	Human Diseases	Cancer: specific types
20	map04060	Cytokine-cytokine receptor interaction	KEGG PATHWAY	20/1691	351/28724	0.592718	1	Environmental Information Processing	Signaling molecules and interaction
1	map00430	Taurine and hypotaurine metabolism	KEGG PATHWAY	1/1691	15/28724	0.597616	1	Metabolism	Metabolism of other amino acids
1	map00920	Sulfur metabolism	KEGG PATHWAY	1/1691	15/28724	0.597616	1	Metabolism	Energy metabolism
4	map00071	Fatty acid degradation	KEGG PATHWAY	4/1691	71/28724	0.607797	1	Metabolism	Lipid metabolism
36	map05131	Shigellosis	KEGG PATHWAY	36/1691	633/28724	0.609994	1	Human Diseases	Infectious disease: bacterial
9	map04725	Cholinergic synapse	KEGG PATHWAY	9/1691	161/28724	0.611561	1	Organismal Systems	Nervous system
6	map04216	Ferroptosis	KEGG PATHWAY	6/1691	108/28724	0.61657	1	Cellular Processes	Cell growth and death
5	map04622	RIG-I-like receptor signaling pathway	KEGG PATHWAY	5/1691	90/28724	0.617028	1	Organismal Systems	Immune system
5	map00040	Pentose and glucuronate interconversions	KEGG PATHWAY	5/1691	90/28724	0.617028	1	Metabolism	Carbohydrate metabolism
5	map04340	Hedgehog signaling pathway	KEGG PATHWAY	5/1691	90/28724	0.617028	1	Environmental Information Processing	Signal transduction
4	map04215	Apoptosis - multiple species	KEGG PATHWAY	4/1691	72/28724	0.618897	1	Cellular Processes	Cell growth and death
9	map04935	Growth hormone synthesis, secretion and action	KEGG PATHWAY	9/1691	162/28724	0.61899	1	Organismal Systems	Endocrine system
7	map04620	Toll-like receptor signaling pathway	KEGG PATHWAY	7/1691	127/28724	0.625257	1	Organismal Systems	Immune system
22	map05034	Alcoholism	KEGG PATHWAY	22/1691	394/28724	0.632354	1	Human Diseases	Substance dependence
3	map04614	Renin-angiotensin system	KEGG PATHWAY	3/1691	55/28724	0.635919	1	Organismal Systems	Endocrine system
4	map04923	Regulation of lipolysis in adipocytes	KEGG PATHWAY	4/1691	74/28724	0.640495	1	Organismal Systems	Endocrine system
8	map04350	TGF-beta signaling pathway	KEGG PATHWAY	8/1691	149/28724	0.655896	1	Environmental Information Processing	Signal transduction
20	map05418	Fluid shear stress and atherosclerosis	KEGG PATHWAY	20/1691	364/28724	0.657483	1	Human Diseases	Cardiovascular disease
10	map04926	Relaxin signaling pathway	KEGG PATHWAY	10/1691	186/28724	0.66123	1	Organismal Systems	Endocrine system
9	map04380	Osteoclast differentiation	KEGG PATHWAY	9/1691	168/28724	0.66195	1	Organismal Systems	Development and regeneration
9	map04724	Glutamatergic synapse	KEGG PATHWAY	9/1691	169/28724	0.668828	1	Organismal Systems	Nervous system
7	map04012	ErbB signaling pathway	KEGG PATHWAY	7/1691	133/28724	0.673022	1	Environmental Information Processing	Signal transduction
5	map04623	Cytosolic DNA-sensing pathway	KEGG PATHWAY	5/1691	96/28724	0.673511	1	Organismal Systems	Immune system
10	map03018	RNA degradation	KEGG PATHWAY	10/1691	188/28724	0.674266	1	Genetic Information Processing	Folding, sorting and degradation
3	map00030	Pentose phosphate pathway	KEGG PATHWAY	3/1691	59/28724	0.682835	1	Metabolism	Carbohydrate metabolism
25	map04014	Ras signaling pathway	KEGG PATHWAY	25/1691	460/28724	0.689362	1	Environmental Information Processing	Signal transduction
4	map00591	Linoleic acid metabolism	KEGG PATHWAY	4/1691	79/28724	0.690886	1	Metabolism	Lipid metabolism
2	map03430	Mismatch repair	KEGG PATHWAY	2/1691	40/28724	0.69096	1	Genetic Information Processing	Replication and repair
15	map04022	cGMP-PKG signaling pathway	KEGG PATHWAY	15/1691	283/28724	0.699189	1	Environmental Information Processing	Signal transduction
4	map00310	Lysine degradation	KEGG PATHWAY	4/1691	81/28724	0.709577	1	Metabolism	Amino acid metabolism
3	map00760	Nicotinate and nicotinamide metabolism	KEGG PATHWAY	3/1691	62/28724	0.714958	1	Metabolism	Metabolism of cofactors and vitamins
10	map05222	Small cell lung cancer	KEGG PATHWAY	10/1691	195/28724	0.717485	1	Human Diseases	Cancer: specific types
1	map00450	Selenocompound metabolism	KEGG PATHWAY	1/1691	21/28724	0.720464	1	Metabolism	Metabolism of other amino acids
8	map04625	C-type lectin receptor signaling pathway	KEGG PATHWAY	8/1691	159/28724	0.725008	1	Organismal Systems	Immune system
20	map05135	Yersinia infection	KEGG PATHWAY	20/1691	382/28724	0.73755	1	Human Diseases	Infectious disease: bacterial
7	map05212	Pancreatic cancer	KEGG PATHWAY	7/1691	144/28724	0.750126	1	Human Diseases	Cancer: specific types
10	map03015	mRNA surveillance pathway	KEGG PATHWAY	10/1691	201/28724	0.751443	1	Genetic Information Processing	Translation
7	map03320	PPAR signaling pathway	KEGG PATHWAY	7/1691	147/28724	0.768731	1	Organismal Systems	Endocrine system
5	map04742	Taste transduction	KEGG PATHWAY	5/1691	108/28724	0.768951	1	Organismal Systems	Sensory system
20	map04210	Apoptosis	KEGG PATHWAY	20/1691	390/28724	0.769073	1	Cellular Processes	Cell growth and death
19	map04390	Hippo signaling pathway	KEGG PATHWAY	19/1691	373/28724	0.774218	1	Environmental Information Processing	Signal transduction
2	map05033	Nicotine addiction	KEGG PATHWAY	2/1691	48/28724	0.782728	1	Human Diseases	Substance dependence
9	map04657	IL-17 signaling pathway	KEGG PATHWAY	9/1691	188/28724	0.782938	1	Organismal Systems	Immune system
8	map00270	Cysteine and methionine metabolism	KEGG PATHWAY	8/1691	169/28724	0.784117	1	Metabolism	Amino acid metabolism
19	map04666	Fc gamma R-mediated phagocytosis	KEGG PATHWAY	19/1691	376/28724	0.785448	1	Organismal Systems	Immune system
5	map03022	Basal transcription factors	KEGG PATHWAY	5/1691	111/28724	0.789158	1	Genetic Information Processing	Transcription
5	map05031	Amphetamine addiction	KEGG PATHWAY	5/1691	111/28724	0.789158	1	Human Diseases	Substance dependence
18	map04514	Cell adhesion molecules (CAMs)	KEGG PATHWAY	18/1691	360/28724	0.794665	1	Environmental Information Processing	Signaling molecules and interaction
14	map04110	Cell cycle	KEGG PATHWAY	14/1691	286/28724	0.797441	1	Cellular Processes	Cell growth and death
22	map05163	Human cytomegalovirus infection	KEGG PATHWAY	22/1691	437/28724	0.804754	1	Human Diseases	Infectious disease: viral
20	map04072	Phospholipase D signaling pathway	KEGG PATHWAY	20/1691	401/28724	0.808144	1	Environmental Information Processing	Signal transduction
24	map05203	Viral carcinogenesis	KEGG PATHWAY	24/1691	478/28724	0.817293	1	Human Diseases	Cancer: overview
4	map04913	Ovarian steroidogenesis	KEGG PATHWAY	4/1691	95/28724	0.817523	1	Organismal Systems	Endocrine system
9	map04550	Signaling pathways regulating pluripotency of stem cells	KEGG PATHWAY	9/1691	196/28724	0.821385	1	Cellular Processes	Cellular community - eukaryotes
9	map04914	Progesterone-mediated oocyte maturation	KEGG PATHWAY	9/1691	199/28724	0.834382	1	Organismal Systems	Endocrine system
8	map04750	Inflammatory mediator regulation of TRP channels	KEGG PATHWAY	8/1691	181/28724	0.842	1	Organismal Systems	Sensory system
9	map04520	Adherens junction	KEGG PATHWAY	9/1691	201/28724	0.84263	1	Cellular Processes	Cellular community - eukaryotes
5	map04213	Longevity regulating pathway - multiple species	KEGG PATHWAY	5/1691	121/28724	0.846639	1	Organismal Systems	Aging
5	map04610	Complement and coagulation cascades	KEGG PATHWAY	5/1691	122/28724	0.851601	1	Organismal Systems	Immune system
20	map04010	MAPK signaling pathway	KEGG PATHWAY	20/1691	418/28724	0.858898	1	Environmental Information Processing	Signal transduction
11	map04310	Wnt signaling pathway	KEGG PATHWAY	11/1691	247/28724	0.866244	1	Environmental Information Processing	Signal transduction
18	map04621	NOD-like receptor signaling pathway	KEGG PATHWAY	18/1691	385/28724	0.872212	1	Organismal Systems	Immune system
9	map04068	FoxO signaling pathway	KEGG PATHWAY	9/1691	210/28724	0.875812	1	Environmental Information Processing	Signal transduction
1	map04950	Maturity onset diabetes of the young	KEGG PATHWAY	1/1691	35/28724	0.880556	1	Human Diseases	Endocrine and metabolic disease
30	map04145	Phagosome	KEGG PATHWAY	30/1691	621/28724	0.890734	1	Cellular Processes	Transport and catabolism
23	map04910	Insulin signaling pathway	KEGG PATHWAY	23/1691	489/28724	0.891514	1	Organismal Systems	Endocrine system
18	map05414	Dilated cardiomyopathy (DCM)	KEGG PATHWAY	18/1691	394/28724	0.893749	1	Human Diseases	Cardiovascular disease
12	map05142	Chagas disease (American trypanosomiasis)	KEGG PATHWAY	12/1691	277/28724	0.895786	1	Human Diseases	Infectious disease: parasitic
10	map04114	Oocyte meiosis	KEGG PATHWAY	10/1691	237/28724	0.896413	1	Cellular Processes	Cell growth and death
3	map04918	Thyroid hormone synthesis	KEGG PATHWAY	3/1691	88/28724	0.897261	1	Organismal Systems	Endocrine system
5	map05032	Morphine addiction	KEGG PATHWAY	5/1691	133/28724	0.897848	1	Human Diseases	Substance dependence
5	map04727	GABAergic synapse	KEGG PATHWAY	5/1691	135/28724	0.904761	1	Organismal Systems	Nervous system
11	map05161	Hepatitis B	KEGG PATHWAY	11/1691	262/28724	0.908548	1	Human Diseases	Infectious disease: viral
3	map04961	Endocrine and other factor-regulated calcium reabsorption	KEGG PATHWAY	3/1691	91/28724	0.90948	1	Organismal Systems	Excretory system
18	map04140	Autophagy - animal	KEGG PATHWAY	18/1691	403/28724	0.912273	1	Cellular Processes	Transport and catabolism
16	map04218	Cellular senescence	KEGG PATHWAY	16/1691	370/28724	0.924153	1	Cellular Processes	Cell growth and death
14	map04371	Apelin signaling pathway	KEGG PATHWAY	14/1691	330/28724	0.924184	1	Environmental Information Processing	Signal transduction
7	map03008	Ribosome biogenesis in eukaryotes	KEGG PATHWAY	7/1691	190/28724	0.935102	1	Genetic Information Processing	Translation
4	map04917	Prolactin signaling pathway	KEGG PATHWAY	4/1691	123/28724	0.936043	1	Organismal Systems	Endocrine system
10	map04211	Longevity regulating pathway	KEGG PATHWAY	10/1691	255/28724	0.937099	1	Organismal Systems	Aging
55	map04144	Endocytosis	KEGG PATHWAY	55/1691	1124/28724	0.937446	1	Cellular Processes	Transport and catabolism
2	map00970	Aminoacyl-tRNA biosynthesis	KEGG PATHWAY	2/1691	76/28724	0.943034	1	Genetic Information Processing	Translation
26	map05170	Human immunodeficiency virus 1 infection	KEGG PATHWAY	26/1691	585/28724	0.948554	1	Human Diseases	Infectious disease: viral
10	map04915	Estrogen signaling pathway	KEGG PATHWAY	10/1691	264/28724	0.951642	1	Organismal Systems	Endocrine system
18	map04080	Neuroactive ligand-receptor interaction	KEGG PATHWAY	18/1691	432/28724	0.954776	1	Environmental Information Processing	Signaling molecules and interaction
9	map05235	PD-L1 expression and PD-1 checkpoint pathway in cancer	KEGG PATHWAY	9/1691	249/28724	0.960427	1	Human Diseases	Cancer: overview
21	map03040	Spliceosome	KEGG PATHWAY	21/1691	499/28724	0.961218	1	Genetic Information Processing	Transcription
7	map04728	Dopaminergic synapse	KEGG PATHWAY	7/1691	211/28724	0.968161	1	Organismal Systems	Nervous system
22	map05205	Proteoglycans in cancer	KEGG PATHWAY	22/1691	532/28724	0.971233	1	Human Diseases	Cancer: overview
17	map05206	MicroRNAs in cancer	KEGG PATHWAY	17/1691	430/28724	0.971479	1	Human Diseases	Cancer: overview
8	map04658	Th1 and Th2 cell differentiation	KEGG PATHWAY	8/1691	240/28724	0.974379	1	Organismal Systems	Immune system
10	map04660	T cell receptor signaling pathway	KEGG PATHWAY	10/1691	287/28724	0.976204	1	Organismal Systems	Immune system
5	map00140	Steroid hormone biosynthesis	KEGG PATHWAY	5/1691	172/28724	0.976451	1	Metabolism	Lipid metabolism
6	map05144	Malaria	KEGG PATHWAY	6/1691	199/28724	0.978956	1	Human Diseases	Infectious disease: parasitic
6	map05321	Inflammatory bowel disease (IBD)	KEGG PATHWAY	6/1691	202/28724	0.981239	1	Human Diseases	Immune disease
10	map04664	Fc epsilon RI signaling pathway	KEGG PATHWAY	10/1691	295/28724	0.981621	1	Organismal Systems	Immune system
4	map00830	Retinol metabolism	KEGG PATHWAY	4/1691	154/28724	0.982467	1	Metabolism	Metabolism of cofactors and vitamins
24	map04020	Calcium signaling pathway	KEGG PATHWAY	24/1691	598/28724	0.984259	1	Environmental Information Processing	Signal transduction
11	map04662	B cell receptor signaling pathway	KEGG PATHWAY	11/1691	323/28724	0.984691	1	Organismal Systems	Immune system
22	map05166	Human T-cell leukemia virus 1 infection	KEGG PATHWAY	22/1691	559/28724	0.985092	1	Human Diseases	Infectious disease: viral
12	map04650	Natural killer cell mediated cytotoxicity	KEGG PATHWAY	12/1691	349/28724	0.986412	1	Organismal Systems	Immune system
24	map05322	Systemic lupus erythematosus	KEGG PATHWAY	24/1691	610/28724	0.988281	1	Human Diseases	Immune disease
7	map04630	Jak-STAT signaling pathway	KEGG PATHWAY	7/1691	242/28724	0.989783	1	Environmental Information Processing	Signal transduction
6	map04115	p53 signaling pathway	KEGG PATHWAY	6/1691	219/28724	0.990372	1	Cellular Processes	Cell growth and death
10	map04640	Hematopoietic cell lineage	KEGG PATHWAY	10/1691	317/28724	0.991217	1	Organismal Systems	Immune system
27	map05202	Transcriptional misregulation in cancer	KEGG PATHWAY	27/1691	686/28724	0.991712	1	Human Diseases	Cancer: overview
9	map04659	Th17 cell differentiation	KEGG PATHWAY	9/1691	298/28724	0.992465	1	Organismal Systems	Immune system
46	map04120	Ubiquitin mediated proteolysis	KEGG PATHWAY	46/1691	1075/28724	0.99272	1	Genetic Information Processing	Folding, sorting and degradation
6	map05332	Graft-versus-host disease	KEGG PATHWAY	6/1691	226/28724	0.99274	1	Human Diseases	Immune disease
18	map05152	Tuberculosis	KEGG PATHWAY	18/1691	509/28724	0.994213	1	Human Diseases	Infectious disease: bacterial
11	map04612	Antigen processing and presentation	KEGG PATHWAY	11/1691	353/28724	0.994354	1	Organismal Systems	Immune system
16	map05323	Rheumatoid arthritis	KEGG PATHWAY	16/1691	472/28724	0.995306	1	Human Diseases	Immune disease
16	map04064	NF-kappa B signaling pathway	KEGG PATHWAY	16/1691	475/28724	0.995722	1	Environmental Information Processing	Signal transduction
5	map05134	Legionellosis	KEGG PATHWAY	5/1691	213/28724	0.995789	1	Human Diseases	Infectious disease: bacterial
7	map04940	Type I diabetes mellitus	KEGG PATHWAY	7/1691	270/28724	0.996595	1	Human Diseases	Endocrine and metabolic disease
11	map05146	Amoebiasis	KEGG PATHWAY	11/1691	374/28724	0.997298	1	Human Diseases	Infectious disease: parasitic
40	map04530	Tight junction	KEGG PATHWAY	40/1691	1008/28724	0.997764	1	Cellular Processes	Cellular community - eukaryotes
21	map03013	RNA transport	KEGG PATHWAY	21/1691	612/28724	0.998071	1	Genetic Information Processing	Translation
16	map04150	mTOR signaling pathway	KEGG PATHWAY	16/1691	504/28724	0.9983	1	Environmental Information Processing	Signal transduction
10	map01521	EGFR tyrosine kinase inhibitor resistance	KEGG PATHWAY	10/1691	381/28724	0.999161	1	Human Diseases	Drug resistance: antineoplastic
8	map05140	Leishmaniasis	KEGG PATHWAY	8/1691	331/28724	0.999192	1	Human Diseases	Infectious disease: parasitic
11	map05162	Measles	KEGG PATHWAY	11/1691	410/28724	0.999284	1	Human Diseases	Infectious disease: viral
32	map05132	Salmonella infection	KEGG PATHWAY	32/1691	890/28724	0.999367	1	Human Diseases	Infectious disease: bacterial
6	map05340	Primary immunodeficiency	KEGG PATHWAY	6/1691	291/28724	0.999555	1	Human Diseases	Immune disease
5	map03410	Base excision repair	KEGG PATHWAY	5/1691	283/28724	0.999831	1	Genetic Information Processing	Replication and repair
8	map04672	Intestinal immune network for IgA production	KEGG PATHWAY	8/1691	380/28724	0.999899	1	Organismal Systems	Immune system
13	map05150	Staphylococcus aureus infection	KEGG PATHWAY	13/1691	518/28724	0.999923	1	Human Diseases	Infectious disease: bacterial
7	map05310	Asthma	KEGG PATHWAY	7/1691	365/28724	0.999944	1	Human Diseases	Immune disease
14	map05416	Viral myocarditis	KEGG PATHWAY	14/1691	557/28724	0.999955	1	Human Diseases	Cardiovascular disease
3	map05143	African trypanosomiasis	KEGG PATHWAY	3/1691	248/28724	0.999962	1	Human Diseases	Infectious disease: parasitic
9	map05330	Allograft rejection	KEGG PATHWAY	9/1691	433/28724	0.999967	1	Human Diseases	Immune disease
17	map04217	Necroptosis	KEGG PATHWAY	17/1691	642/28724	0.999969	1	Cellular Processes	Cell growth and death
9	map05320	Autoimmune thyroid disease	KEGG PATHWAY	9/1691	452/28724	0.999986	1	Human Diseases	Immune disease
33	map04151	PI3K-Akt signaling pathway	KEGG PATHWAY	33/1691	1071/28724	0.999995	1	Environmental Information Processing	Signal transduction
14	map00010	Glycolysis / Gluconeogenesis	KEGG PATHWAY	14/1691	623/28724	0.999997	1	Metabolism	Carbohydrate metabolism
46	map05169	Epstein-Barr virus infection	KEGG PATHWAY	46/1691	1385/28724	0.999997	1	Human Diseases	Infectious disease: viral
32	map05130	Pathogenic Escherichia coli infection	KEGG PATHWAY	32/1691	1092/28724	0.999999	1	Human Diseases	Infectious disease: bacterial
21	map04066	HIF-1 signaling pathway	KEGG PATHWAY	21/1691	955/28724	1	1	Environmental Information Processing	Signal transduction
92	map03010	Ribosome	KEGG PATHWAY	92/1691	2854/28724	1	1	Genetic Information Processing	Translation
